# Supplementary material for: A Flame-Retardant Phytic-Acid-Based LbL-Coating for Cotton Using Polyvinylamine
Source: MDPI journal article supplement (doi:10.3390/polym12051202), 2020-05-25
Supplement: s1 [file s1]

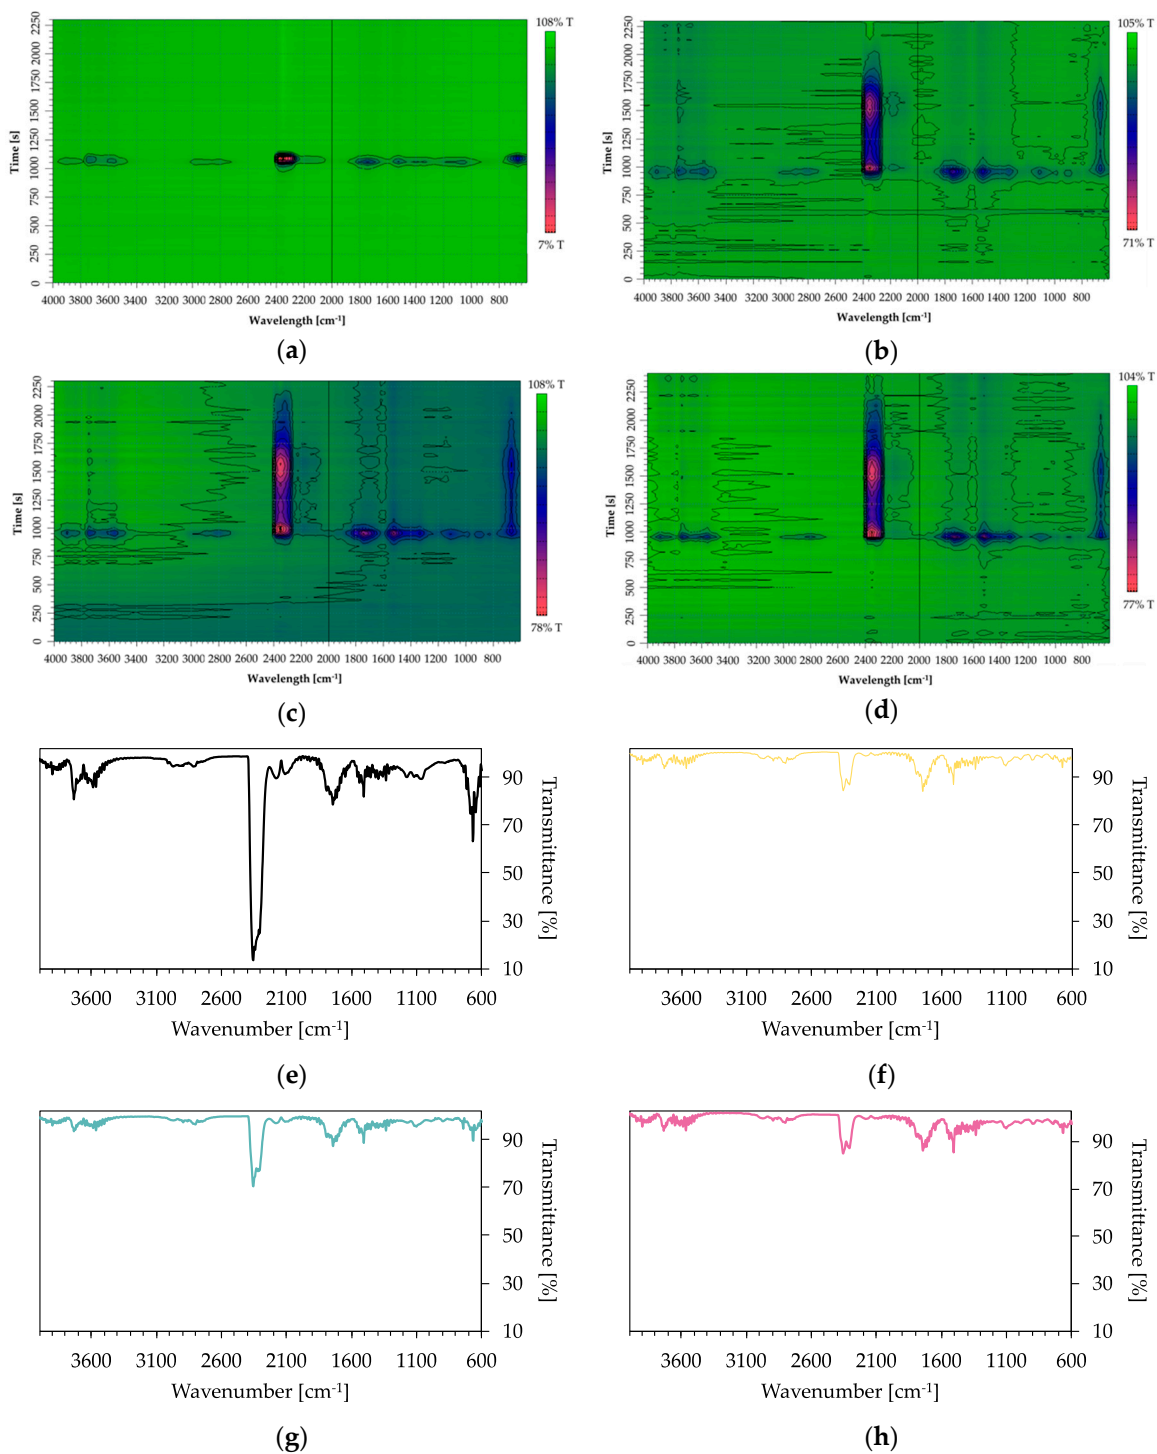

**Figure S1.** 2D plots and FTIR-spectra of the corresponding first peak maxima of uncoated and coated cotton fabrics, obtained by TGA-FTIR investigations in air. (a) 2D plot of uncoated cotton; (b) 2D plot of 5 BL; (c) 2D plot of 10 BL; (d) 2D plot of 15 BL; (e) spectrum at 1070 s (357 °C in TGA) of uncoated cotton; (f) 5 BL spectrum at 950 s (317 °C in TGA); (g) 10 BL spectrum at 970 s (323 °C in TGA); (h) 15 BL spectrum at 950 s (317 °C).
